# Supplementary material for: Chitinase Chit62J4 Essential for Chitin Processing by Human Microbiome Bacterium Clostridium paraputrificum J4
Source: MDPI journal article supplement (doi:10.3390/molecules26195978), 2021-10-02
Supplement: s1 [file s1]

## Supplementary data for

### Chitinase Chit62J4 essential for chitin processing by human microbiome bacterium *Clostridium paraputrificum* J4

by

Jan Dohnálek, Jarmila Dušková, Galina Tishchenko, Petr Kolenko, Tereza Skálová, Petr Novák, Karla Fejfarová, and Jiří Šimůnek

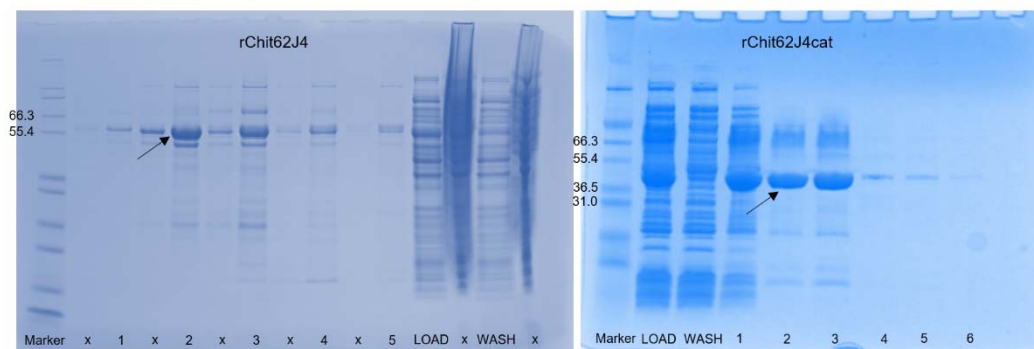

**Supplementary Figure S1.** SDS-PAGE analysis of purified rChit62J4 and rChit62J4cat by Ni-NTA affinity chromatography. The black arrow marks the target recombinant protein as verified by mass spectrometry peptide mapping. Left panel - rChit62J4 – lane content: Marker: molecular weight marker Mark 12™ Unstained Standard from Novex, Life Technologies, 1-5: elution fractions of purified protein, load volume 5  $\mu$ L, LOAD: culture lysate, 1  $\mu$ L, WASH: column flow-through, 1  $\mu$ L. Lanes marked x are the same fractions with a lower amount of loaded sample (for lanes 1-5, 1  $\mu$ L) or a higher amount (lanes LOAD and WASH, 5  $\mu$ L). Right panel - rChit62J4cat – lane content: Marker: molecular weight marker Mark 12™ Unstained Standard from Novex, Life Technologies, LOAD: culture lysate, WASH: column flow-through, 1-6: elution fractions of purified protein.

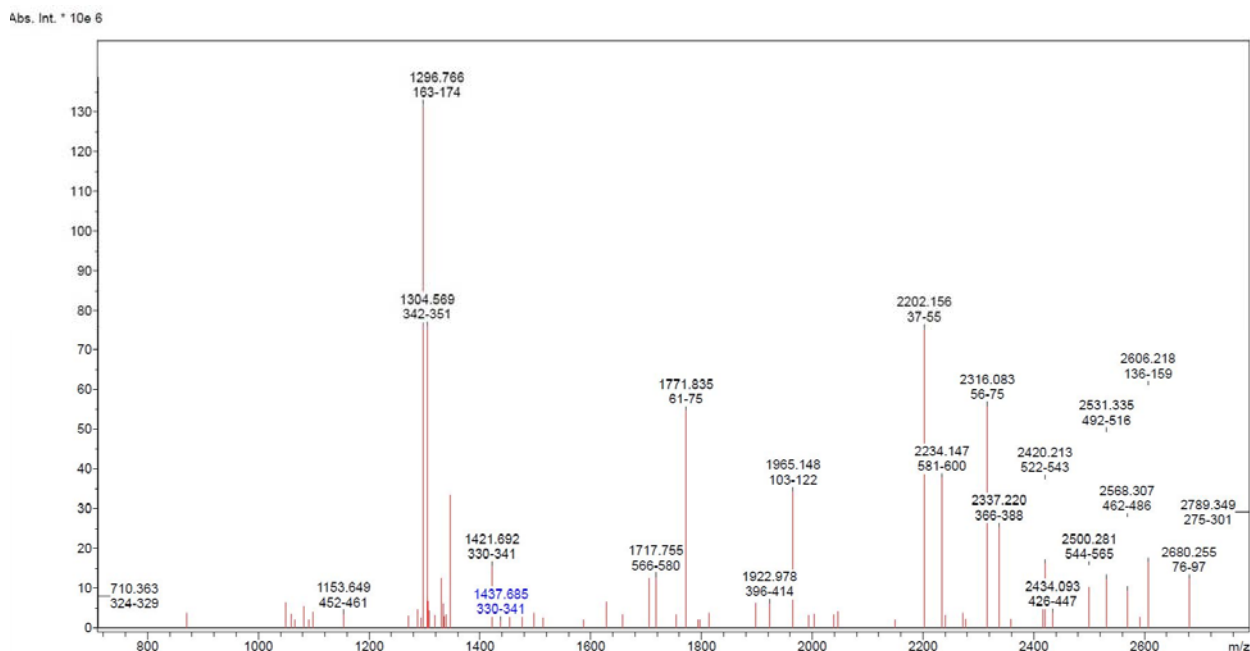

Peaklist:

| Peak | Mass     | Intensity     | Peak | Mass     | Intensity    | Peak | Mass     | Intensity    | Peak | Mass     | Intensity    |
|------|----------|---------------|------|----------|--------------|------|----------|--------------|------|----------|--------------|
| 1    | 710.363  | 4220078.000   | 2    | 871.029  | 3712087.000  | 3    | 1049.522 | 6406552.000  | 4    | 1060.064 | 3536853.000  |
| 5    | 1065.517 | 2029604.000   | 6    | 1082.054 | 5399797.000  | 7    | 1091.533 | 1953959.000  | 8    | 1098.028 | 3877401.000  |
| 9    | 1153.649 | 4507695.000   | 10   | 1271.088 | 3026842.000  | 11   | 1287.063 | 4601382.000  | 12   | 1293.079 | 2391077.000  |
| 13   | 1296.766 | 138514704.000 | 14   | 1304.569 | 77244144.000 | 15   | 1305.553 | 8738322.000  | 16   | 1309.054 | 4227188.000  |
| 17   | 1318.748 | 3179130.000   | 18   | 1330.584 | 12396302.000 | 19   | 1333.889 | 6027312.000  | 20   | 1334.723 | 2846790.000  |
| 21   | 1338.778 | 3421139.000   | 22   | 1346.580 | 33410280.000 | 23   | 1421.692 | 16644326.000 | 24   | 1437.685 | 2899053.000  |
| 25   | 1453.681 | 3289002.000   | 26   | 1475.753 | 2737019.000  | 27   | 1498.087 | 3651518.000  | 28   | 1514.063 | 2522535.000  |
| 29   | 1586.776 | 1920390.000   | 30   | 1628.761 | 6532752.000  | 31   | 1656.829 | 3284459.000  | 32   | 1705.947 | 12497191.000 |
| 33   | 1717.755 | 13796333.000  | 34   | 1754.807 | 3344757.000  | 35   | 1771.835 | 55665604.000 | 36   | 1793.818 | 1887480.000  |
| 37   | 1797.852 | 1901875.000   | 38   | 1813.844 | 3740478.000  | 39   | 1897.988 | 6251233.000  | 40   | 1922.978 | 7187925.000  |
| 41   | 1965.148 | 35370200.000  | 42   | 1993.982 | 3098879.000  | 43   | 2003.103 | 3494569.000  | 44   | 2039.020 | 3288979.000  |
| 45   | 2046.052 | 4111871.000   | 46   | 2150.087 | 1903918.000  | 47   | 2202.156 | 76594776.000 | 48   | 2234.147 | 38799428.000 |
| 49   | 2240.116 | 3195768.000   | 50   | 2272.104 | 3657977.000  | 51   | 2276.158 | 2058295.000  | 52   | 2316.083 | 56839276.000 |
| 53   | 2337.220 | 26418876.000  | 54   | 2358.091 | 2157787.000  | 55   | 2417.073 | 5551382.000  | 56   | 2420.213 | 16195770.000 |
| 57   | 2434.093 | 4787011.000   | 58   | 2500.281 | 10207933.000 | 59   | 2531.335 | 12331016.000 | 60   | 2568.307 | 9386221.000  |
| 61   | 2591.269 | 2700710.000   | 62   | 2606.218 | 16658981.000 | 63   | 2680.255 | 13401998.000 | 64   | 2789.349 | 17001606.000 |

|                     |                     |                     |                     |                     |                     |                     |                     |                     |                     |
|---------------------|---------------------|---------------------|---------------------|---------------------|---------------------|---------------------|---------------------|---------------------|---------------------|
| 10                  | 20                  | 30                  | 40                  | 50                  | 60                  | 70                  | 80                  | 90                  | 100                 |
| MTRKCKKLVS          | IFA AVL L FVS       | I I P I K A V S A A | Q S L G E R L L V G | Y W H N F D N G T G | I I N L R D V S D K | W D V I N V A F G E | T Y S D R A V V E F | T P C Y D E E Q F I | S D V Q Y I K S G K |
| 110                 | 120                 | 130                 | 140                 | 150                 | 160                 | 170                 | 180                 | 190                 | 200                 |
| K K V I L S I G G Q | N G V V L L P D A T | A K E K F V K S I C | G L V D K Y G F D G | L D I D L E S G I S | L Q A S D I D F K N | P K T P Q I V N L I | S G V R E I S D K Y | G S N F I I S M A P | E T A Y V Q G G I T |
| 210                 | 220                 | 230                 | 240                 | 250                 | 260                 | 270                 | 280                 | 290                 | 300                 |
| A Y G N I W G A Y L | P I I Y G L R D K L | T Y I H V Q H Y N A | G G N Q G L D G V T | Y T Q G T A D Y E V | A M A E M L L Y G F | P I A G N S N N M F | P A L R E D Q V M I | G L P A T Q A A A F | S G G Y I N P T E M |
| 310                 | 320                 | 330                 | 340                 | 350                 | 360                 | 370                 | 380                 | 390                 | 400                 |
| K K A L D Y L I K G | V S Y G G S Y K L A | N G K G Y P A F R G | L M T W S I N W D A | K N N F E F S N N Y | R D Y F D K L T P V | Q N T L K A A T L S | V S N I N N G S Y T | L I A T V F S R N T | A T S Y K I L E G T |
| 410                 | 420                 | 430                 | 440                 | 450                 | 460                 | 470                 | 480                 | 490                 | 500                 |
| M E I S T G I L T A | G N S K D T I I T K | S L S N K E N G Q Y | E Y T M V L N D G I | N S V A S N K V V V | K V E P Q P E L T L | K A A T L S A S A V | N N G N Y T L S A I | V P E Y N K A T S Y | K I L E G S I E V A |
| 510                 | 520                 | 530                 | 540                 | 550                 | 560                 | 570                 | 580                 | 590                 | 600                 |
| S G T L N A G N S E | Q V T L T K I T N   | K E I G S Y N Y T V | V L Y E G A N S V I | S N K V T V V V E N | Y T P E V Q A W A A | Y V A Y K N G D I V | S Y N G S N Y V C R | Q A H T S L P G W E | P T N V A A L W Q K |
| 610                 |                     |                     |                     |                     |                     |                     |                     |                     |                     |

a)

**Supplementary Figure S2.** Peptide mass fingerprinting data for crChit62J4, original mass spectra (top), peak listing (middle), and sequence coverage of the translated open reading frame sequence peg.1890 – Chit62J4 from *Clostridium paraputrificum* J4 (bottom) are shown for four independent experiments (a-d). a) Intensity coverage 76.8%, sequence coverage 62.4%, b) Intensity coverage 77.6%, sequence coverage 59.9%, c) Intensity coverage 72.2%, sequence coverage 61.4%, d) Intensity coverage 76.3%, sequence coverage 63.9%.

(Supplementary Figure S2 cont.)

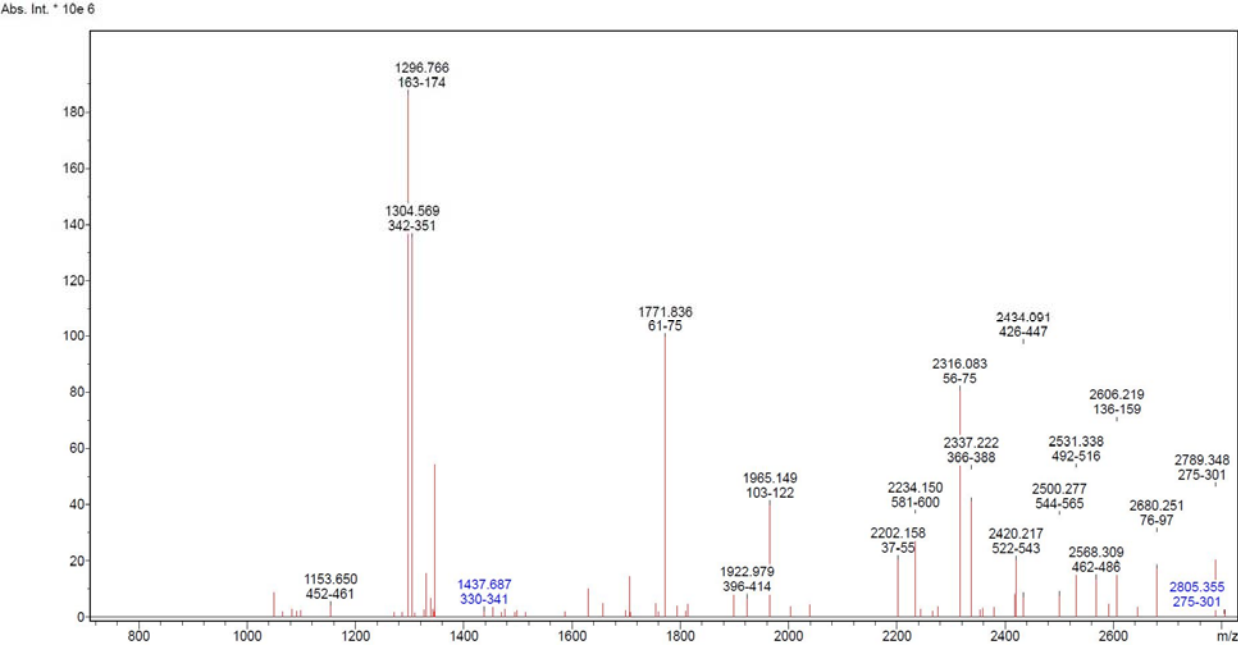

Peaklist:

| Peak | Mass     | Intensity    | Peak | Mass     | Intensity     | Peak | Mass     | Intensity     | Peak | Mass     | Intensity    |
|------|----------|--------------|------|----------|---------------|------|----------|---------------|------|----------|--------------|
| 1    | 710.364  | 6848090.000  | 2    | 1049.523 | 8610887.000   | 3    | 1065.517 | 2008359.000   | 4    | 1082.055 | 2959851.000  |
| 5    | 1091.533 | 2335327.000  | 6    | 1098.029 | 2400376.000   | 7    | 1153.650 | 5465113.000   | 8    | 1271.096 | 1694601.000  |
| 9    | 1286.511 | 1791920.000  | 10   | 1296.766 | 195551040.000 | 11   | 1304.569 | 136856128.000 | 12   | 1308.767 | 1509504.000  |
| 13   | 1326.553 | 2682095.000  | 14   | 1330.585 | 15598307.000  | 15   | 1338.780 | 6812801.000   | 16   | 1342.526 | 2882389.000  |
| 17   | 1344.563 | 1873440.000  | 18   | 1346.581 | 54215324.000  | 19   | 1437.687 | 3702261.000   | 20   | 1453.681 | 3672188.000  |
| 21   | 1469.675 | 1765062.000  | 22   | 1475.753 | 3068807.000   | 23   | 1493.740 | 1635457.000   | 24   | 1498.088 | 2494785.000  |
| 25   | 1514.062 | 1635610.000  | 26   | 1586.775 | 2000163.000   | 27   | 1629.758 | 10074081.000  | 28   | 1656.832 | 4796868.000  |
| 29   | 1698.756 | 2440267.000  | 30   | 1705.884 | 14294766.000  | 31   | 1707.778 | 1703686.000   | 32   | 1754.807 | 4759571.000  |
| 33   | 1759.775 | 1986927.000  | 34   | 1771.836 | 101009720.000 | 35   | 1793.820 | 3909396.000   | 36   | 1809.794 | 2164319.000  |
| 37   | 1813.845 | 4728578.000  | 38   | 1897.989 | 14638581.000  | 39   | 1922.979 | 8106374.000   | 40   | 1965.149 | 41403824.000 |
| 41   | 2003.107 | 3593643.000  | 42   | 2039.024 | 4441381.000   | 43   | 2202.158 | 22008016.000  | 44   | 2234.150 | 31649932.000 |
| 45   | 2244.168 | 2816936.000  | 46   | 2266.140 | 2253523.000   | 47   | 2276.160 | 3750625.000   | 48   | 2316.083 | 82096208.000 |
| 49   | 2337.222 | 41045552.000 | 50   | 2354.039 | 2611049.000   | 51   | 2358.094 | 3079903.000   | 52   | 2379.235 | 3378071.000  |
| 53   | 2417.077 | 8290636.000  | 54   | 2420.217 | 21765570.000  | 55   | 2434.091 | 7203117.000   | 56   | 2500.277 | 7645811.000  |
| 57   | 2531.338 | 19287078.000 | 58   | 2568.309 | 15048933.000  | 59   | 2591.277 | 4660953.000   | 60   | 2606.219 | 18842090.000 |
| 61   | 2644.191 | 3310311.000  | 62   | 2680.251 | 17339524.000  | 63   | 2789.348 | 20365824.000  | 64   | 2805.355 | 2681585.000  |
| 65   | 2830.389 | 1732475.000  |      |          |               |      |          |               |      |          |              |

|            |            |             |             |             |             |             |            |             |            |
|------------|------------|-------------|-------------|-------------|-------------|-------------|------------|-------------|------------|
| 10         | 20         | 30          | 40          | 50          | 60          | 70          | 80         | 90          | 100        |
| MTRKCKKLVS | IFAAVLLFVS | IIPKAVSAA   | QSLGERLLVG  | YWHNFDNGTG  | IINLRDVS DK | WDVINVA FGE | TYSDRAVVEF | TPCYDEEQFI  | SDVQYIKSKG |
| 110        | 120        | 130         | 140         | 150         | 160         | 170         | 180        | 190         | 200        |
| KKVILSIGGQ | NGVLLPDAT  | AKERFKVKSIC | GLVDKYGF DG | LDIDLES GIS | LQASDTDFKN  | PKTIPQIVNLI | SGVREISDKY | GSNFIISM AF | ETAYVQGGIT |
| 210        | 220        | 230         | 240         | 250         | 260         | 270         | 280        | 290         | 300        |
| AYGNIWGAYL | PIIYGLRDKL | TYIHWQH YNA | GGNQGLDGVT  | YTQGTADYEV  | AMAEMLLYGF  | PIAGNSNNMF  | PALREDQVMI | GLPATQAAAP  | SGGYINPTEM |
| 310        | 320        | 330         | 340         | 350         | 360         | 370         | 380        | 390         | 400        |
| KKALDYLIKQ | VSYGGSYKLA | NGKGYPAFRG  | LMTWSINWDA  | KNNFEFSNNY  | RDYFDKLPV   | QNTLKAATLS  | VSNINNGSYT | LTATVPSRNT  | ATSYKILEGI |
| 410        | 420        | 430         | 440         | 450         | 460         | 470         | 480        | 490         | 500        |
| MEISTGILTA | GNSKDTIITK | SLSNKENGQY  | EYTMVLNDGI  | NSVASNKVVV  | KVEPQPELIL  | KAATLSASAV  | NNGNYTLSAI | VPEYNKATSY  | KILEGSIEVA |
| 510        | 520        | 530         | 540         | 550         | 560         | 570         | 580        | 590         | 600        |
| SGTLNAGNSE | QVILIKITIN | KEIGSYNYTV  | VLVEGANSVI  | SNKVTVVVEN  | YTFEVQAWAA  | YVAYKNGDIV  | SYNGSNYVCR | QAHTSLPGWE  | PTNVAALWQK |
| 610        |            |             |             |             |             |             |            |             |            |
| Q          |            |             |             |             |             |             |            |             |            |

b)

## Abs. Int. \* 10e 6

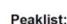

| Peak | Mass     | Intensity     | Peak | Mass     | Intensity    | Peak | Mass     | Intensity     | Peak | Mass     | Intensity    |
|------|----------|---------------|------|----------|--------------|------|----------|---------------|------|----------|--------------|
| 1    | 710.363  | 1182500.000   | 2    | 760.396  | 3162115.000  | 3    | 1162.511 | 3690552.000   | 4    | 1013.602 | 3369315.000  |
| 5    | 1049.523 | 724778.000    | 6    | 1091.533 | 3058535.000  | 7    | 1153.649 | 9449314.000   | 8    | 1179.603 | 3711735.000  |
| 9    | 1296.766 | 164232016.000 | 10   | 1300.533 | 192765.000   | 11   | 1304.568 | 103538296.000 | 12   | 1305.554 | 10957888.000 |
| 13   | 1309.055 | 2065579.000   | 14   | 1318.750 | 1703573.000  | 15   | 1320.587 | 1907478.000   | 16   | 1330.585 | 11571003.000 |
| 17   | 1333.689 | 7961566.000   | 18   | 1338.778 | 6553808.000  | 19   | 1342.525 | 3378451.000   | 20   | 1346.580 | 41213820.000 |
| 21   | 1358.578 | 1605469.000   | 22   | 1365.643 | 2347269.000  | 23   | 1383.694 | 2461790.000   | 24   | 1421.693 | 8193095.000  |
| 25   | 1434.775 | 1550488.000   | 26   | 1437.687 | 2933492.000  | 27   | 1453.679 | 2205167.000   | 28   | 1475.753 | 5358855.000  |
| 29   | 1493.740 | 3508810.000   | 30   | 1610.759 | 2029890.000  | 31   | 1654.789 | 1764708.000   | 32   | 1656.829 | 3566622.000  |
| 33   | 1705.852 | 6582473.000   | 34   | 1721.848 | 1582825.000  | 35   | 1733.878 | 2516234.000   | 36   | 1743.781 | 2772123.000  |
| 37   | 1754.807 | 4782864.000   | 38   | 1759.778 | 2527467.000  | 39   | 1771.835 | 76837464.000  | 40   | 1791.733 | 2456409.000  |
| 41   | 1794.822 | 7743606.000   | 42   | 1809.790 | 2688126.000  | 43   | 1813.845 | 3662924.000   | 44   | 1897.988 | 13431463.000 |
| 45   | 1922.979 | 10419443.000  | 46   | 1938.976 | 3577788.000  | 47   | 1965.148 | 34540452.000  | 48   | 1987.105 | 3927463.000  |
| 49   | 1993.982 | 3747975.000   | 50   | 2003.106 | 3664819.000  | 51   | 2039.023 | 4533479.000   | 52   | 2076.978 | 2046170.000  |
| 53   | 2202.157 | 13408848.000  | 54   | 2211.116 | 4832978.000  | 55   | 2225.125 | 3408449.000   | 56   | 2234.148 | 25106614.000 |
| 57   | 2239.147 | 6386153.000   | 58   | 2260.161 | 2395530.000  | 59   | 2272.099 | 2378942.000   | 60   | 2276.155 | 2938614.000  |
| 61   | 2287.107 | 2803328.000   | 62   | 2316.083 | 35662936.000 | 63   | 2337.222 | 27748904.000  | 64   | 2354.035 | 20170.000    |
| 65   | 2388.096 | 21581892.000  | 66   | 2395.100 | 1358538.000  | 67   | 2416.272 | 767348.000    | 68   | 2429.214 | 2022214.000  |
| 69   | 2434.095 | 7900921.000   | 70   | 2458.167 | 2386606.000  | 71   | 2500.285 | 5302698.000   | 72   | 2551.336 | 19007628.000 |
| 73   | 2568.309 | 12085400.000  | 74   | 2591.273 | 4284304.000  | 75   | 2606.222 | 16528914.000  | 76   | 2644.191 | 2446789.000  |
| 77   | 2680.253 | 15664976.000  | 78   | 2789.349 | 15805786.000 | 79   | 2805.357 | 3093646.000   | 80   | 2827.330 | 2444337.000  |

[illegible]

4



(Supplementary Figure S2 cont.)

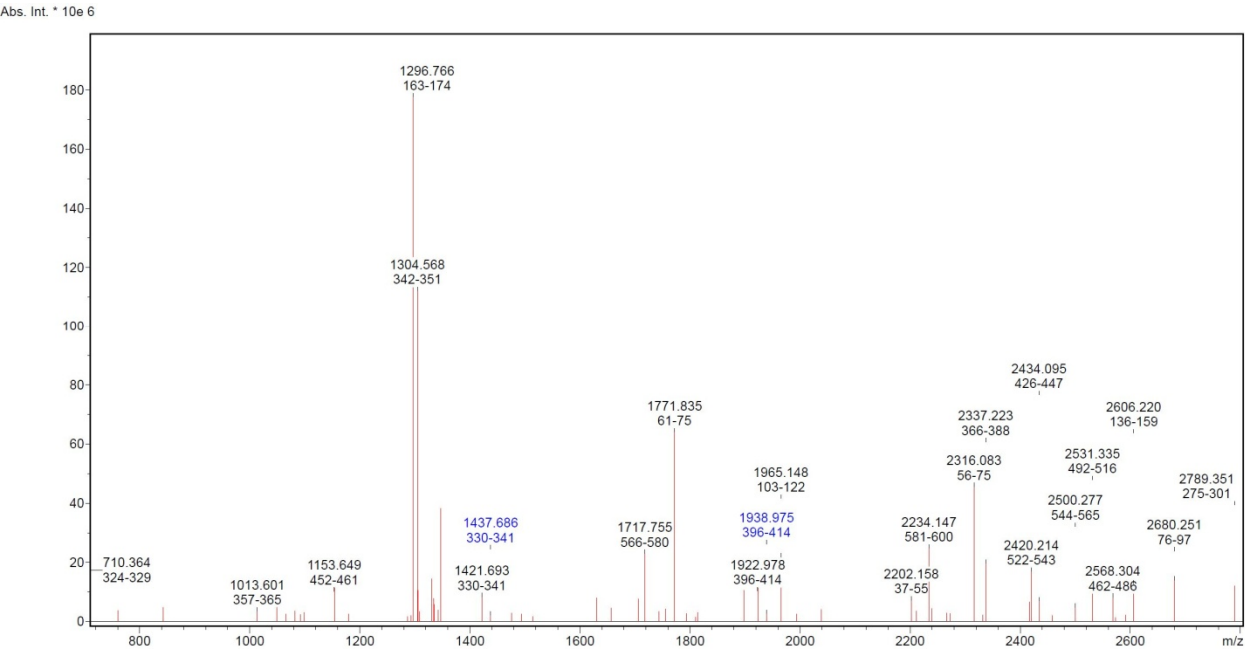

Peaklist:

| Peak | Mass     | Intensity    | Peak | Mass     | Intensity     | Peak | Mass     | Intensity     | Peak | Mass     | Intensity    |
|------|----------|--------------|------|----------|---------------|------|----------|---------------|------|----------|--------------|
| 1    | 710.364  | 12340896.000 | 2    | 760.396  | 3830154.000   | 3    | 842.511  | 4740910.000   | 4    | 1013.601 | 4819602.000  |
| 5    | 1049.522 | 8552011.000  | 6    | 1065.517 | 2638096.000   | 7    | 1082.055 | 3593344.000   | 8    | 1091.533 | 2411446.000  |
| 9    | 1098.028 | 2979181.000  | 10   | 1153.649 | 11514362.000  | 11   | 1179.603 | 2574783.000   | 12   | 1286.510 | 1714922.000  |
| 13   | 1293.079 | 2059209.000  | 14   | 1296.766 | 186389312.000 | 15   | 1304.568 | 113413616.000 | 16   | 1305.554 | 10600455.000 |
| 17   | 1309.053 | 3381451.000  | 18   | 1330.585 | 14396547.000  | 19   | 1333.689 | 7900010.000   | 20   | 1334.722 | 5845993.000  |
| 21   | 1342.526 | 3924459.000  | 22   | 1346.580 | 38261784.000  | 23   | 1421.693 | 9671189.000   | 24   | 1437.686 | 2145459.000  |
| 25   | 1475.753 | 2955225.000  | 26   | 1493.739 | 2479590.000   | 27   | 1514.062 | 1648013.000   | 28   | 1629.757 | 8003267.000  |
| 29   | 1656.830 | 4620969.000  | 30   | 1705.853 | 7591749.000   | 31   | 1717.755 | 24275192.000  | 32   | 1743.781 | 3388186.000  |
| 33   | 1754.808 | 4261807.000  | 34   | 1771.835 | 65352696.000  | 35   | 1793.818 | 2749753.000   | 36   | 1809.793 | 1475227.000  |
| 37   | 1813.842 | 3112028.000  | 38   | 1897.988 | 10553100.000  | 39   | 1922.978 | 11629520.000  | 40   | 1938.975 | 2620739.000  |
| 41   | 1965.148 | 21711482.000 | 42   | 1993.983 | 2572497.000   | 43   | 2039.023 | 4111928.000   | 44   | 2202.158 | 8493909.000  |
| 45   | 2211.113 | 3517304.000  | 46   | 2234.147 | 26083756.000  | 47   | 2239.147 | 4448765.000   | 48   | 2266.139 | 2896924.000  |
| 49   | 2272.105 | 2654972.000  | 50   | 2316.083 | 46922636.000  | 51   | 2332.085 | 2137308.000   | 52   | 2337.223 | 19681924.000 |
| 53   | 2417.071 | 6661793.000  | 54   | 2420.214 | 18274086.000  | 55   | 2434.095 | 6867112.000   | 56   | 2458.162 | 1975222.000  |
| 57   | 2500.277 | 4739723.000  | 58   | 2531.335 | 17976754.000  | 59   | 2568.304 | 9505688.000   | 60   | 2573.117 | 1294469.000  |
| 61   | 2591.263 | 2226033.000  | 62   | 2606.220 | 12630081.000  | 63   | 2680.251 | 13907604.000  | 64   | 2789.351 | 12038024.000 |
| 65   | 2805.353 | 2370028.000  |      |          |               |      |          |               |      |          |              |

|             |            |             |             |             |             |            |             |            |             |
|-------------|------------|-------------|-------------|-------------|-------------|------------|-------------|------------|-------------|
| 10          | 20         | 30          | 40          | 50          | 60          | 70         | 80          | 90         | 100         |
| MTRKCKKLVS  | IFAAVLLFVS | IIPKAVSAA   | QSLGERLLVG  | YWHNFDNGTG  | IINLRDVS DK | WDVINVAFGE | TYS DRAVVEF | TPCYDEEQFI | SDVQYIKSKG  |
| 110         | 120        | 130         | 140         | 150         | 160         | 170        | 180         | 190        | 200         |
| KKVILSIGGQ  | NGVLLPDAT  | AKEKFVKSIC  | GLVDKYGF DG | LDIDLES GIS | LQASDIDFKN  | PKTPQIVNLI | SGVREISDKY  | GSNFIISMAP | ETAYVQGGIT  |
| 210         | 220        | 230         | 240         | 250         | 260         | 270        | 280         | 290        | 300         |
| AYGNIWGAYL  | PIIYGLRDKL | TYIHVQH YNA | GGNQGLDGV T | YTQGTADYEV  | AMAEMLLYGF  | PIAGNSNNMF | PALREDQVMI  | GLPATQAAAP | SGGYINPT EM |
| 310         | 320        | 330         | 340         | 350         | 360         | 370        | 380         | 390        | 400         |
| KKALDYLIK G | VSYGGSYKLA | NGRGYPAFRG  | LMTWSINWDA  | KNNFEFSNNY  | RDYFDKLT PV | QNTLKAATLS | VSNINNGSYT  | LTATVPSRNT | ATSYKILEGT  |
| 410         | 420        | 430         | 440         | 450         | 460         | 470        | 480         | 490        | 500         |
| MEISTGLTIA  | GNSKDTIITK | SLSNKENGQY  | EYTMVLNDGT  | NSVASNKVVV  | KVEPQPELTL  | KAATLSASAV | NNGNYTLSAI  | VPEYNKATSY | KILEGSIEVA  |
| 510         | 520        | 530         | 540         | 550         | 560         | 570        | 580         | 590        | 600         |
| SGTLNAGNSE  | QVILTKKITN | KEIGSYNYTV  | VLYEGANSVI  | SNKVTVVVEN  | YTPVQAWAA   | YVAYKNGDIV | SYNGSNYVCR  | QAHTSLPGWE | PTNVAALWQK  |
| 610         |            |             |             |             |             |            |             |            |             |
| Q           |            |             |             |             |             |            |             |            |             |

d)

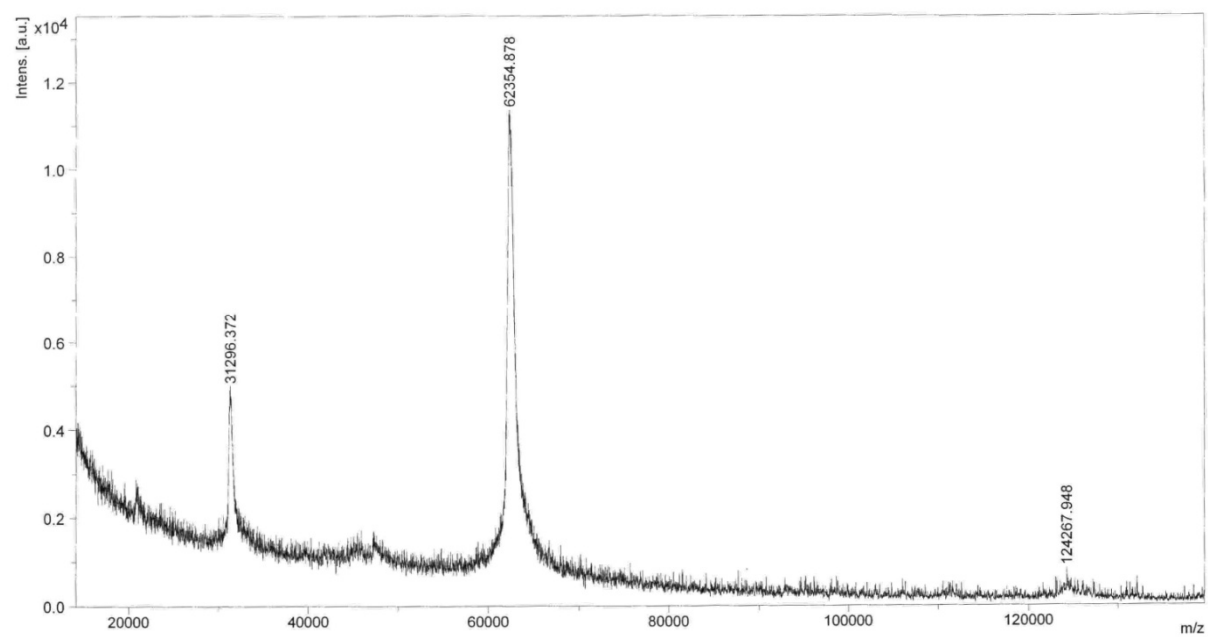

**Supplementary Figure S3.** MALDI-TOF spectrum of crChit62J4.

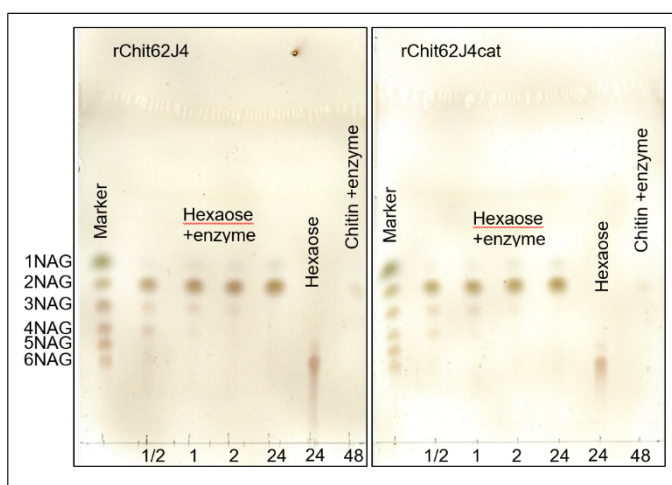

**Supplementary Figure S4.** Thin-layer chromatography analysis of reaction products of rChit62J4 (left panel) and rChit62J4cat (right panel) with chitinhexaose for ½ to 24 h and CM-chitin for 48 h (marked Chitin+enzyme). Marker is a mixture of N-acetyl glucosamine, chitinbiose, chitintriose, chitintetraose, chitinpentaoase and chitinhexaose in water marked as 1NAG, 2NAG, etc., respectively. Chitinhexaose was solubilized in the reaction mixture without the enzyme and applied as a control.

>ENA|KX353699|KX353699.1 Clostridium paraputrificum strain J4 chitinase Chit62 precursor, gene, complete cds.

ATGACTAGAAAGTGTAAGAACTAGTATCAATTTTTGCTGCTGTATTACTATTTGTATCA  
ATTATTCCTATTAAGGCAGTTAGTGCAGCACAAAGCTTAGGAGAGAGGTTACTTGTGGGA  
TATTGGCATAACTTTGATAATGGCACAGGAATTATTAACCTTGAGGGATGTGTCAGATAAA  
TGGGATGTTATAAACGTAGCTTTTGGAGAAACATATAGTGATAGAGCTGTAGTTGAATTT  
ACACCTTGTTATGATGAAGAACAGTTTATTTTCAGATGTTTCAGTACATTAAGAGCAAAGGT  
AAAAAGTTATTTTATCAATAGGTGGACAAAATGGTGTAGTATTACTACCAGATGCAACA  
GCTAAAGAAAAATTTGTTAAGTCAATATGTGGTTTAGTAGATAAAATATGGCTTTGATGGT  
TTGGATATAGACTTAGAATCCGGTATATCATTACAAGCATCAGATACAGATTTCAAGAAT  
CCTAAAACAGCACAAATAGTTAATCTTATTTTCAGGTGTAAGGGAAATATCTGATAAATAT  
GGATCAAACTTTATTATAAGTATGGCTCCAGAAACAGCTTATGTTCAAGGTGGAATTACT  
GCTTATGGAAATATTTGGGGAGCTTATCTTCCAATAATATATGGATTAAAGAGACAAATTA  
ACTTATATACATGTACAACATTATAATGCTGGTGGTAATCAAGGATTAGATGGTGTCCACA  
TATACACAAGGAACAGCAGATTATGAAGTAGCAATGGCAGAAATGCTTTTATATGGATTT  
CCTATAGCAGGTAATAGTAATAATATGTTCCAGCTTTAAGAGAAGACCAAGTTATGATT  
GGATTGCCAGCAACTCAGGCTGCTGCACCAAGTGGTGGATATATAAATCCAACAGAAATG  
AAGAAAGCATTAGATTATTTAATTAAGGTGTATCATATGGTGGAAAGTTATAAGTTAGCT  
AATGGTAAAGGATATCCAGCATTTCAGAGGTTAATGACATGGTCTATTAATGGGATGCT  
AAAAATAATTTGAGTTTTCTAATAATTATAGAGATTACTTTGATAAACTAACTCCAGTT  
CAAAATACATTAAGGCTGCAACTCTTCTGTTAGCAATATTAATAATGGAAGTTATACA  
TTAACAGCTACAGTACCATCAAGAAATCTGCAACAAGTTATAAGATTCTAGAGGGGACA  
ATGGAAATTTCTACAGGAACATTAAACAGCAGGAAATTTCTAAGGATACTATAATTACAAAG  
AGTTTAAGCAATAAAGAAAATGGACAATATGAATATACTATGGTTTTAAATGATGGCACT  
AATTCTGTAGCATCAAATAAGGTAGTAGTAAAGGTAGAACCTCAACCAGAACTTACATTA  
AAAGCTGCAACATTATCAGCTAGCGCTGTTAATAATGGAATTTATACTCTATCAGCTATA  
GTTCTGTAATATAATAAGGCAACAAGTTATAAAATCTTGAAGGAAGTATAGAAGTAGCT  
TCAGGTACATTAATAGCTGGTAATAGTGAACAAGTAACTCTTACAAAAAATCACAAAT  
AAAGAGATTGGTAGCTATAATTACACAGTTGTTCTTTATGAAGAGCAAATCTCTGTATA  
TCAAATAAAGTAACTGTTGTAGTAGAAAACTACACACCAGAGGTCCAAGCTTGGGCAGCT  
TATGTAGCATATAAAAAATGGTGATATAGTAAGTTAATGAAGCAATTATGTTTGTAGA  
CAGGCTCACACATCTTTACCAGGATGGGAGCCAACCTAATGTAGCAGCATTATGGCAAAAA  
CAATAG

a)

>tr|A0A1C9J7J5|A0A1C9J7J5\_9CLOT Chitinase Chit62 OS=Clostridium  
paraputrificum OX=29363 PE=3 SV=1  
MTRKCKKLVSIFAAVLLFVSIIPKAVSAAQSLGERLLVGYWHNFDNGTGIINLRDVSDK  
WDVINVAFGETYSDRAVVEFTPCYDEEQFISDVQYIKSKGKKVILSIGGQNGVVLLPDAT  
AKEKFVKSIICGLVDKYGFDGLDIDLESIGISLQASDTDFKNPKTPQIVNLISGVREISDKY  
GSNFIISMPEYAYVQGGITAYGNIWGAYLPPIIYGLRDKLTYIHVQHYNAGGNQGLDGV  
YTQGTADYEVAMAEMLLYGFP IAGNSNNMFALREDQVMIGLPATQAAAPSGGYINPTM  
KKALDYLIKGVSYGGSYKLANGKGYPAFRGLMTWSINWDAKNNFEFSNNYRDYFDKLT  
PVQNTLKAATLSVSNINNGSYTLTATVPSRNTATSYKILEGTMEISTGTLTAGNSKDTIITK  
SLSNKENGYEYTMVLNDGTNSVASNKVVVKVEPQPELTAKAATLSASAVNNGNYT  
LSAIVPEYNKATSYKILEGSI EVASGTLNAGNSEQVTLTKKITNKEIGSYNYTVVLYEGANS  
VI SNKVTVVVENYTPVQAWAAYVAYKNGDIVSYNGSNYVCRQAHTSLPGWEPTNVAALWQK  
Q

b)

**Supplementary Figure S5.** Sequence of Chit62J4. a) DNA sequence of the GeneBank record KX353699 and b) The translated amino acid sequence of the UniProt record A0A1C9J7J5.



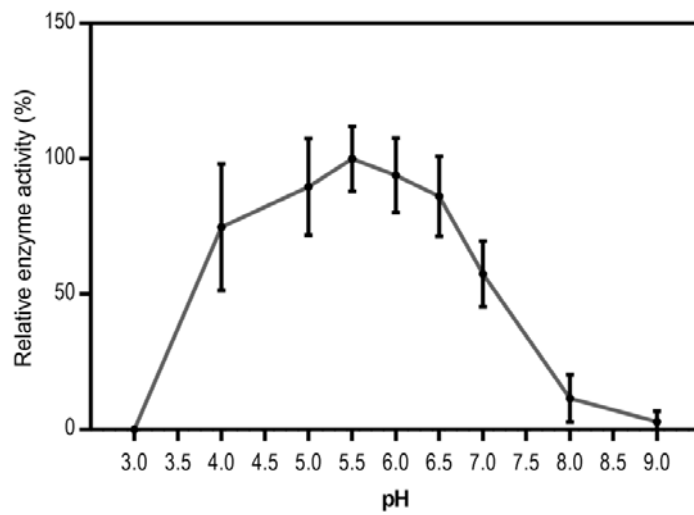

a)

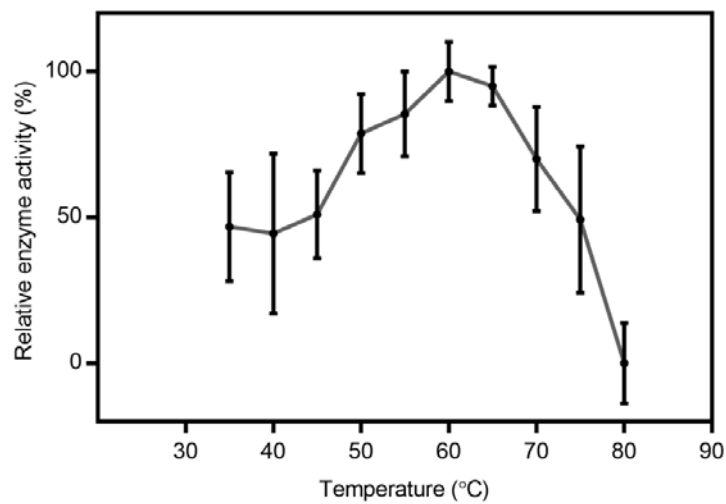

b)

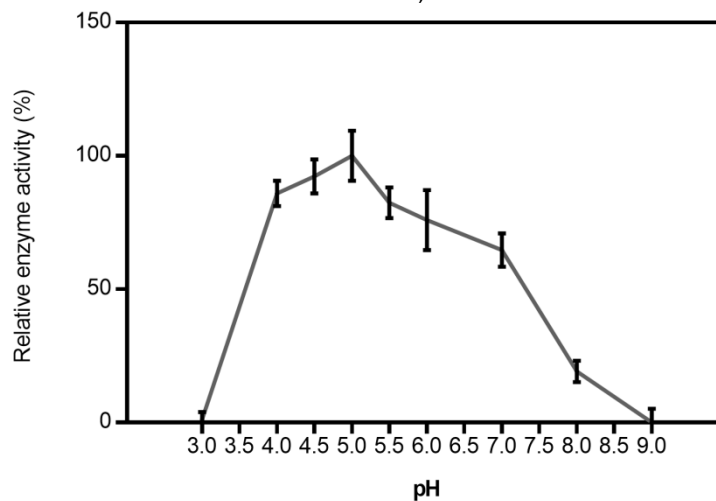

c)

**Supplementary Figure S6.** Dependence of the crChit62J4 activity toward pNGG on a) pH and b) temperature and c) of rChit62J4cat on pH. Mean values from three measurements and standard deviations are marked. Activities were normalized to the maximum value in the profile. Graphics created with GraphPad Prism version 7.02 for Windows (GraphPad Software, La Jolla California USA, [www.graphpad.com](http://www.graphpad.com)).

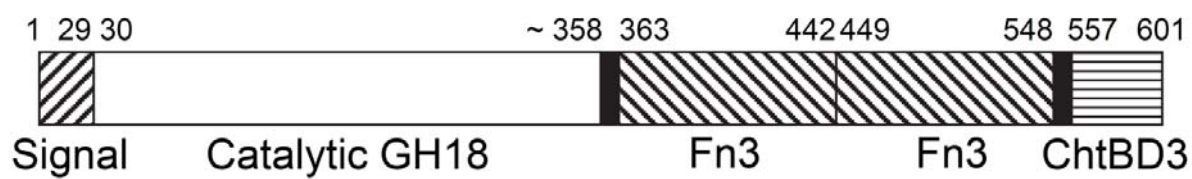

**Supplementary Figure S7.** Proposed domain structure of Chit62J4.

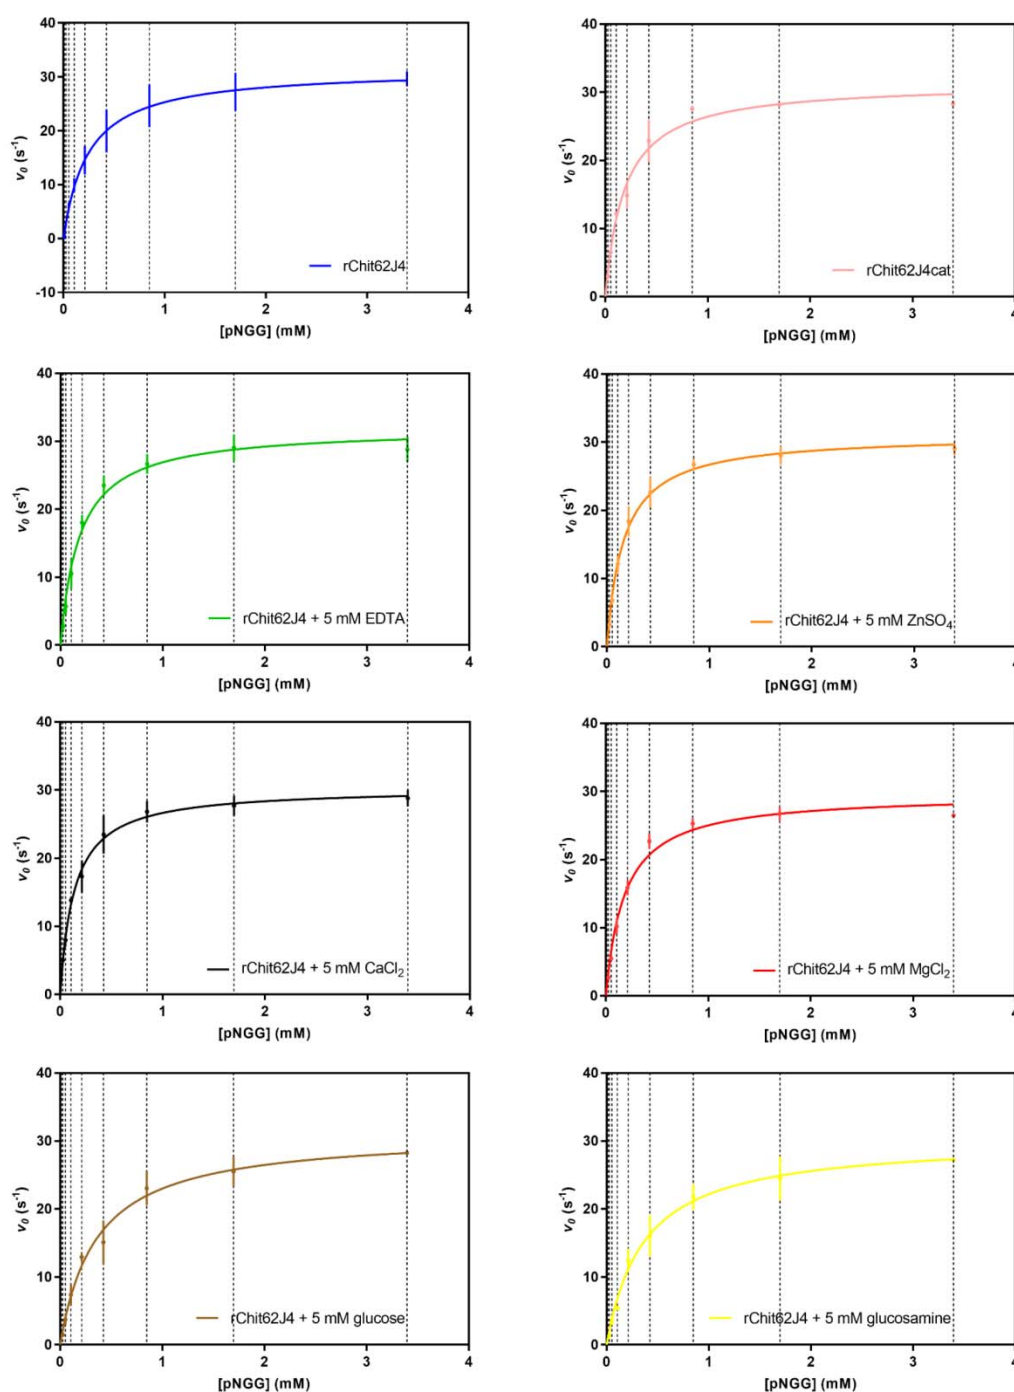

**Supplementary Figure S8.** Michaelis-Menten kinetics for rChit62J4 and rChit62J4cat and of rChit62J4 in the presence of selected compounds (marked in the legend). The activity was measured in triplicates for 9 concentration points (marked by vertical lines) and the mean value was used. Mean values and standard deviations are shown. The Michaelis-Menten curves were fitted using GraphPad Prism version 7.02 for Windows (GraphPad Software, La Jolla California USA, [www.graphpad.com](http://www.graphpad.com)).

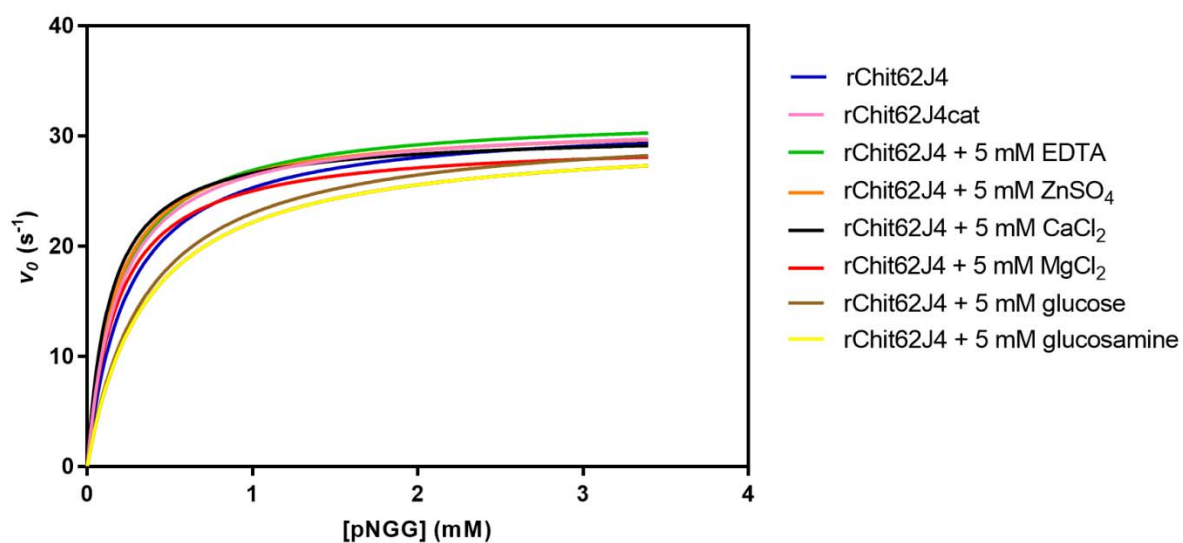

**Supplementary Figure S9.** Michaelis-Menten kinetics for rChit62J4 and rChit62J4cat and of rChit62J4 in the presence of selected compounds – an overlay of the resulting fitted curves from Supplementary Figure S6 (identical color coding is marked in the legend). The Michaelis-Menten curves were fitted using GraphPad Prism version 7.02 for Windows (GraphPad Software, La Jolla California USA, [www.graphpad.com](http://www.graphpad.com)).

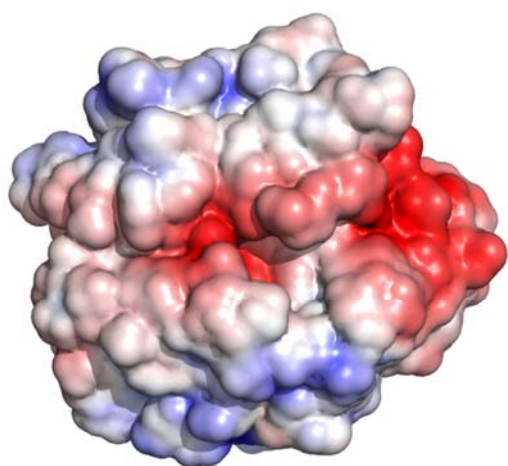

Chit62J4, pH 5.5

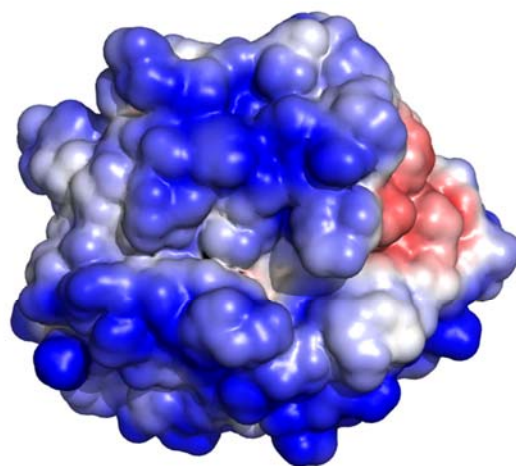

ChiNCTU2, pH 5.5

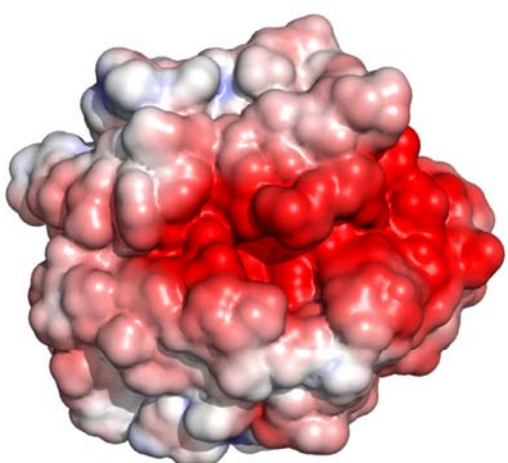

Chit62J4, pH 7.0

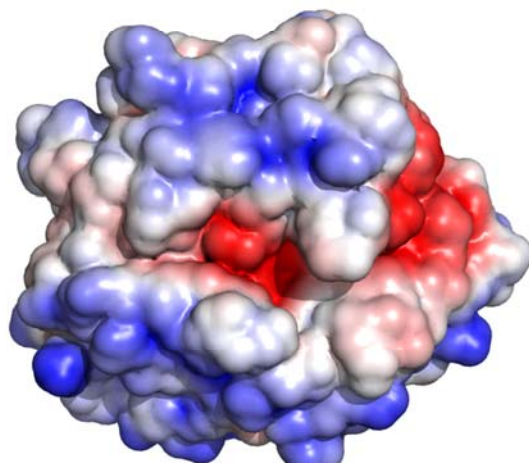

ChiNCTU2, pH 7.0

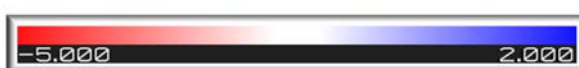

**Supplementary Figure S10.** Electrostatic surface potential of the catalytic domain of Chit62J4 (model) and chitinase ChiNCTU2 at important pH levels. Notice the similar behavior of the homologous enzymes at distinct pH levels following their pI points and showing enzyme optimization for function in different environments, Chit62J4 at pH 5.5 (pI 4.9) and ChiNCTU2 at pH 7 (pI 6.0). The color scale is set between electrostatic potential values  $-5 \text{ kT/e}$  (red) and  $+2 \text{ kT/e}$  (blue).



**Table S1.** Oligonucleotides applied for PCR amplification of rChit62J4 and rChit62J4cat.

|                             |                                |
|-----------------------------|--------------------------------|
| Chit62J4pET15forw (XhoI)    | TATATACTCGAGGCACAAAGCTTAGGAGAG |
| Chit62J4pET15rev (BamHI)    | TATATAGGATCCCTATTGTTTTTGCCATAA |
| Chit62J4CATpET15rev (BamHI) | TATATAGGATCCTTAACTGGAGTTAGTTT  |
